# Supplementary material for: Molecular interactions between monoclonal oligomer-specific antibody 5E3 and its amyloid beta cognates
Source: PLOS journal article supplement (doi:10.1371/journal.pone.0232266), 2020-05-29
Supplement: S19 (10.1371/journal.pone.0232266.s019) [file journal.pone.0232266.s019]

|                              | The oligomer residue | The oligomer chain | Fv5E3 residue | Fv5E3 chain | Fv5E3 residue position | Type              | Occupancy |
|------------------------------|----------------------|--------------------|---------------|-------------|------------------------|-------------------|-----------|
| Hexamer by Shafrir et al.    | I32                  | B                  | Y32           | light       | CDR1                   | hydrophobic       | 4.38%     |
|                              | A2                   | B                  | Y49           | light       | framework              | hydrophobic       | 7.27%     |
|                              | A30                  | B                  | Y49           | light       | framework              | hydrophobic       | 11.30%    |
|                              | I31                  | B                  | Y32           | light       | CDR1                   | hydrophobic       | 11.36%    |
|                              | A30                  | F                  | I29           | light       | CDR1                   | hydrophobic       | 12.70%    |
|                              | I31                  | B                  | Y91           | light       | CDR3                   | hydrophobic       | 28.01%    |
|                              | A30                  | E                  | Y52           | heavy       | CDR2                   | hydrophobic       | 78.07%    |
|                              | I31                  | G                  | Y94           | light       | CDR3                   | hydrophobic       | 89.13%    |
|                              | E3                   | B                  | K60           | light       | framework              | ionic             | 3.61%     |
|                              | K28                  | B                  | E102          | heavy       | CDR3                   | ionic             | 95.57%    |
|                              | K28                  | A                  | Y32           | heavy       | CDR1                   | cation- $\pi$     | 6.98%     |
| Hexamer by Laganowsky et al. | V40                  | E                  | I28           | heavy       | CDR1                   | hydrophobic       | 3.22%     |
|                              | V40                  | F                  | Y52           | heavy       | CDR2                   | hydrophobic       | 3.4%      |
|                              | V36                  | G                  | M99           | heavy       | CDR3                   | hydrophobic       | 5.27%     |
|                              | V40                  | F                  | P53           | heavy       | CDR2                   | hydrophobic       | 6.75%     |
|                              | L34                  | D                  | A51           | light       | CDR2                   | hydrophobic       | 8.01%     |
|                              | V40                  | F                  | Y33           | heavy       | CDR1                   | hydrophobic       | 12.28%    |
|                              | V36                  | G                  | Y32           | heavy       | CDR1                   | hydrophobic       | 12.73%    |
|                              | V39                  | F                  | F29           | heavy       | CDR1                   | hydrophobic       | 13.69%    |
|                              | A30                  | B                  | Y94           | light       | CDR3                   | hydrophobic       | 21.35%    |
|                              | L34                  | G                  | Y32           | heavy       | CDR1                   | hydrophobic       | 23.57%    |
|                              | L34                  | G                  | Y91           | light       | CDR3                   | hydrophobic       | 24.61%    |
|                              | V40                  | F                  | F29           | heavy       | CDR1                   | hydrophobic       | 25.41%    |
|                              | L34                  | D                  | Y32           | light       | CDR1                   | hydrophobic       | 41.93%    |
| Dodecamer by Gallion         | F19                  | U                  | Y91           | light       | CDR3                   | hydrophobic       | 10.22%    |
|                              | F19                  | U                  | I29           | light       | CDR1                   | hydrophobic       | 11.53%    |
|                              | I32                  | D                  | I28           | heavy       | CDR1                   | hydrophobic       | 14.55%    |
|                              | F19                  | U                  | Y32           | light       | CDR1                   | hydrophobic       | 27.93%    |
|                              | V18                  | D                  | M99           | heavy       | CDR3                   | hydrophobic       | 28.85%    |
|                              | A21                  | U                  | Y91           | light       | CDR3                   | hydrophobic       | 39.82%    |
|                              | V40                  | D                  | Y27           | heavy       | CDR1                   | hydrophobic       | 43.13%    |
|                              | I31                  | D                  | Y27           | heavy       | CDR1                   | hydrophobic       | 54.35%    |
|                              | K28                  | U                  | D55           | light       | framework              | ionic             | 45.02%    |
|                              | E22                  | D                  | R96           | light       | CDR3                   | ionic             | 85.7%     |
|                              | D23                  | U                  | R46           | light       | framework              | ionic             | 90.54%    |
|                              | F19                  | U                  | Y91           | light       | CDR3                   | aromatic-aromatic | 37.91%    |

**Table S7.** The residues participating in hydrophobic, ionic and cation- $\pi$  interactions between Fv5E3, and the computational and theoretical models of A $\beta$ Os.
